1 Evolutionary adaptations for the temporal processing of natural sounds by the anuran  
2 peripheral auditory system

3

4 Katrina M. Schrode<sup>1\*</sup> • Mark A. Bee<sup>1,2</sup>

5

6 <sup>1</sup>Graduate Program in Neuroscience, University of Minnesota, Minneapolis, Minnesota 55455

7 <sup>2</sup>Department of Ecology, Evolution and Behavior, University of Minnesota, St. Paul, Minnesota 55108

8

9 Running title: Temporal processing in treefrogs

10

11 7 figures

12 Corresponding author:

13 Katrina M. Schrode

14 720 Rutland Ave

15 Baltimore, MD 21205

16 USA

17 Ph: 443-287-6339

18 Fx: 410-955-1299

19 Email: [kschrod1@jhmi.edu](mailto:kschrod1@jhmi.edu).

20

21 **Keywords** Auditory evoked potentials • Green treefrog • Temporal Processing • Communication •

22 Grey treefrog • Hearing

23

24 \*KM Schrode is now at the Department of Otolaryngology, Johns Hopkins School of Medicine,

25 Baltimore, Maryland 21205.

26 **Abstract**

27 Sensory systems function most efficiently when processing natural stimuli, such as vocalizations, and  
28 it is thought that this reflects evolutionary adaptation. Among the best-described examples of  
29 evolutionary adaptation in the auditory system are the frequent matches between spectral tuning in  
30 both the peripheral and central auditory systems of anurans (frogs and toads) and the frequency  
31 spectra of conspecific calls. Tuning to the temporal properties of conspecific calls is less well  
32 established, and in anurans has so far been documented only in the central auditory system. Using  
33 auditory evoked potentials, we asked whether there are species-specific or sex-specific adaptations of  
34 the auditory systems of gray treefrogs (*Hyla chrysoscelis*) and green treefrogs (*H. cinerea*) to the  
35 temporal modulations present in conspecific calls. Modulation rate transfer functions (MRTFs)  
36 constructed from auditory steady-state responses (ASSRs) revealed that each species was more  
37 sensitive than the other to the modulation rates typical of conspecific advertisement calls. In addition,  
38 auditory brainstem responses (ABRs) to paired-clicks indicated relatively better temporal resolution in  
39 green treefrogs, which could represent an adaptation to the faster modulation rates present in this  
40 species' calls. MRTFs and recovery of ABRs to paired-clicks were generally similar between the  
41 sexes, and we found no evidence that males were more sensitive than females to the temporal  
42 modulation patterns characteristic of the aggressive calls used in male-male competition. Together,  
43 our results suggest that efficient processing of the temporal properties of behaviorally relevant sounds  
44 begins at potentially very early stages of the anuran auditory system that include the periphery.

45 **Introduction**

46 A prominent hypothesis in systems neuroscience is that sensory systems are most efficient when  
47 processing natural stimuli (Atick, 1992; Barlow, 1961; Hateren, 1992; Laughlin, 1981; Simoncelli and  
48 Olshausen, 2001). This efficiency reduces energy and resource expenditure associated with sensory  
49 processing. Auditory systems appear well adapted to process the spectral and temporal features of  
50 natural sounds, such as speech and other communication signals (Rieke et al., 1995; Singh and  
51 Theunissen, 2003; Smith and Lewicki, 2006; Suga, 1989; Woolley et al., 2005). Often such  
52 adaptations manifest as selectivity for behaviorally relevant sounds, which helps increase detectability  
53 of signals relative to background noise (Machens et al., 2005; Rieke et al., 1995). For example, the  
54 spectro-temporal tuning of neurons in the midbrain and forebrain of songbirds facilitates  
55 discrimination between conspecific songs, while limiting interference from modulations inherent in  
56 less-behaviorally relevant sounds (Woolley et al., 2005).

57 Research on anuran amphibians (frogs and toads) yielded some of the first examples of  
58 auditory adaptations to natural sounds (Capranica and Moffat, 1975; Frishkopf et al., 1968; Mudry et  
59 al., 1977; Narins and Capranica, 1976). In most anuran species, males have repertoires of calls that are  
60 used for mate attraction and resource defense. In the periphery, one or both of the two inner ear  
61 sensory papillae for detecting airborne sound – the amphibian papilla (AP) and the basilar papilla  
62 (BP) – and their afferents are predominantly tuned to the acoustic frequencies emphasized in  
63 conspecific calls (Capranica and Moffat, 1983; Frishkopf et al., 1968; Narins and Capranica, 1980;  
64 Ryan et al., 1992). Neurons in the central auditory system are also predominantly tuned to acoustic  
65 frequencies in conspecific calls, with some combination-sensitive neurons firing only when multiple  
66 frequencies from conspecific calls are present (Fuzessery and Feng, 1982; Fuzessery and Feng, 1983;  
67 Hall, 1994; Megela, 1983; Mudry and Capranica, 1987a; Mudry and Capranica, 1987b; Mudry et al.,  
68 1977). This matched spectral filtering (Capranica and Moffat, 1983; Simmons, 2013) by both the  
69 peripheral and central nervous systems represents an evolutionary adaptation that facilitates coding of  
70 the frequency spectra of vocalizations, which are especially important natural stimuli for frogs.

71 In addition to spectral properties, temporal properties of anuran calls are also critical for  
72 species and call recognition and intraspecific discrimination (Castellano and Rosso, 2006; Gerhardt,  
73 1978; Gerhardt and Doherty, 1988; Rose and Brenowitz, 2002; Schwartz, 1987; Walkowiak and  
74 Brzoska, 1982). There is evidence for the operation of matched temporal filters in the central auditory  
75 system, but less so in the periphery (Rose and Gooler, 2007; Simmons, 2013). In the central auditory  
76 system, neurons exhibit preferences for specific temporal properties of calls such as the rate of pulses  
77 or amplitude modulation (AM) (Diekamp and Gerhardt, 1995; Eggermont, 1990; Gooler and Feng,  
78 1992; Walkowiak, 1984), inter-pulse interval (Alder and Rose, 1998; Edwards et al., 2002), and  
79 duration (Condon et al., 1991; Gooler and Feng, 1992; Narins and Capranica, 1980; Penna et al.,  
80 1997) using rate codes. In the case of AM, the distributions of AM rates preferred by neurons in the  
81 central auditory system are often centered near the pulse rates or modulation rates characteristic of

82 conspecific calls, suggesting specialization for the neural encoding of the temporal patterns present in  
83 conspecific signals (Diekamp and Gerhardt, 1995; Penna et al., 2001; Rose and Capranica, 1984;  
84 Rose and Capranica, 1985; Rose et al., 1985). In contrast to the rate code common in central auditory  
85 neurons, auditory nerve fibers encode temporal properties in the timing of their impulses. For  
86 example, nerve fibers use a periodicity code to encode AM by phase-locking, or discharging at a  
87 particular phase of the modulation cycle (Dunia and Narins, 1989; Feng et al., 1991; Rose and  
88 Capranica, 1985). The ability of auditory nerve fibers to phase-lock to AM tends to decrease as a  
89 function of increasing modulation rate (Dunia and Narins, 1989; Feng et al., 1991; Rose and  
90 Capranica, 1985). While several studies have verified the ability of anuran auditory nerve fibers to  
91 phase-lock to temporal modulations in the amplitude envelopes of conspecific signals (Capranica and  
92 Moffat, 1975; Frishkopf et al., 1968; Klump et al., 2004; Schwartz and Simmons, 1990; Simmons et  
93 al., 1992; Simmons et al., 1993), there is so far little evidence for enhanced peripheral selectivity  
94 favoring the temporal modulations typical of conspecific calls.

95         The broad aim of this comparative study was to investigate features of temporal processing by  
96 the peripheral auditory system that might reflect adaptations for encoding temporal modulations  
97 present in conspecific vocalizations. We conducted our experiments using two well-studied frogs,  
98 Cope's gray treefrog (*Hyla chrysoscelis*) and the green treefrog (*H. cinerea*) (Bee, 2012; Bee, 2014;  
99 Gerhardt, 1982; Gerhardt, 2001; Gerhardt and Huber, 2002). The advertisement calls that males of  
100 each species produce differ in both spectral and temporal properties (see Fig. 1). The advertisement  
101 call of gray treefrogs is comprised of a series of short (e.g., 10 ms), temporally discrete pulses  
102 delivered at species-specific rates of about 40 to 65 pulses/s (Ward et al., 2013). Pulses have energy at  
103 frequencies of about 1.25 kHz and 2.5 kHz, with the lower frequency peak attenuated by about 11 dB  
104 relative to the higher peak (Ward et al., 2013). In contrast, the advertisement call of the green treefrog  
105 consists of a single, biphasic note (120-200 ms; Gerhardt, 1974a) having an initial pulsed phase, with  
106 pulse rates ranging between about 100 to 200 pulses/s, followed by an un-pulsed phase having marked  
107 waveform periodicity of about 300 Hz (typically ranging from about 200 to 400 Hz) (Oldham and  
108 Gerhardt, 1975). These calls contain spectral peaks of approximately equivalent amplitude, with one  
109 near 0.9 kHz and a second, broader peak between about 2.5 and 3.6 kHz (Gerhardt, 1974a).

110         In addition to advertisement calls, males of both species also use aggressive calls in disputes  
111 with other males over possession of calling sites. The aggressive calls of gray treefrogs exhibit AM in  
112 the range of 50 to 100 Hz, though they typically lack the distinct pulsatile structure of advertisement  
113 calls (MS Reichert, personal communication, June 2014; Reichert and Gerhardt, 2014). The  
114 aggressive calls of green treefrogs are similar to their advertisement calls, but are pulsed throughout at  
115 rates near 50 pulses/s (ranging between 39 and 56 pulses/s (Oldham and Gerhardt, 1975). Female  
116 treefrogs strongly prefer advertisement calls to aggressive calls (Brenowitz and Rose, 1999; Marshall  
117 et al., 2003; Oldham and Gerhardt, 1975; Schwartz, 1986; Schwartz, 1987; Wells and Bard, 1987).

118 Given their importance in male-male competition for calling sites, aggressive calls are likely more  
119 behaviorally salient to males than females.

120 We investigated temporal processing using auditory evoked potentials (AEPs). AEPs measure  
121 neural activity from the auditory nerve and brainstem in response to acoustic stimuli, and they are a  
122 common tool for studying auditory processing in humans and other animals (Brittan-Powell et al.,  
123 2010a; Brittan-Powell et al., 2010b; Gall et al., 2013; Hall, 2007; Henry and Lucas, 2008; Higgs et al.,  
124 2002; Katbamna et al., 1992; Kenyon et al., 1998; Ladich and Fay, 2013; Popov and Supin, 1990;  
125 Supin et al., 1993). We used two well-established AEP techniques that have been used previously to  
126 investigate temporal processing, the auditory steady state response (ASSR) evoked by AM tones and  
127 the auditory brainstem response (ABR) evoked by paired acoustic clicks (Burkard and Deegan, 1984;  
128 Dolphin and Mountain, 1992; Gall et al., 2013; Henry and Lucas, 2008; Mann et al., 2005; Purcell et  
129 al., 2004; Wysocki and Ladich, 2005). The magnitude of the ASSR reflects the degree of neural  
130 synchronization to AM in the signal, and thus the ASSR measures the ability of the auditory system to  
131 track temporal fluctuations in amplitude (Dolphin and Mountain, 1992; Gall et al., 2012; Mann et al.,  
132 2005). ASSR magnitude can be plotted as a function of AM to generate modulation rate transfer  
133 functions (MTRFs) (Fig. 2). MTRFs typically have an overall low-pass shape consistent with phase-  
134 locking in the auditory nerve (Dolphin and Mountain, 1992; Dolphin et al., 1994; Dolphin et al., 1995;  
135 Finneran et al., 2007; Gall et al., 2012). In the present study, we recorded ASSRs in response to tones  
136 of three different carrier frequencies modulated at AM rates between 12.5 Hz and 800 Hz (in 1-octave  
137 steps). For each species, the specific carrier frequencies (denoted low, middle, or high, in reference to  
138 their relative frequencies) were selected based on the species-specific tuning of the AP and BP in our  
139 two study species. We recorded ABRs in response to paired clicks, in which the time between the  
140 clicks (inter-click interval, ICI), varied between trials (Fig. 3). This double-click procedure measures  
141 the ability of the auditory system to resolve two sounds in close temporal proximity (Burkard and  
142 Deegan, 1984; Henry et al., 2011; Supin and Popov, 1995a; Wysocki and Ladich, 2002). We focused  
143 these analyses on the first peak of the ABR (P1; Fig. 4), which is thought to be generated by the  
144 auditory nerve (Achor and Starr, 1980; Buchwald and Huang, 1975; Seaman, 1991). Performance was  
145 measured in terms of percent recovery, which we calculated as the amplitude (as in Fig. 4) of the  
146 response to the second click in a pair as a percentage of the amplitude of the response to a single-  
147 click. Additionally, we calculated the minimum resolvable ICI at which a response to the second click  
148 could be detected.

149 We used data from ASSR and ABR recordings to test two hypotheses related to the temporal  
150 processing of natural sounds. The *species-specific adaptation hypothesis* holds that the auditory  
151 system is specialized to process temporal features characteristic of conspecific advertisement calls  
152 compared with those more typical of heterospecific calls. We based this hypothesis on species-  
153 differences between advertisement calls for two reasons. Advertisement calls are by far the most  
154 common vocalization produced by males of both species. These signals are used in both mate

155 attraction and call site defense and, thus, are behaviorally relevant to both sexes (Garton and Brandon,  
156 1975; Ritke and Semlitsch, 1991; Wells, 1977). Our comparative approach allowed us to make the  
157 following prediction: gray treefrogs should have relatively larger ASSRs than green treefrogs at the  
158 relatively slower modulation rates (e.g. between 25 and 100 Hz) near the pulse rates of gray treefrog  
159 advertisement calls, while green treefrogs should have relatively larger ASSRs than gray treefrogs to  
160 stimuli with relatively faster modulation rates close to those typical of the faster modulations present  
161 in green treefrog advertisement calls (e.g. between 100 and 400 Hz). These species differences should  
162 be reflected in a species  $\times$  modulation rate interaction in analyses of MRTFs. We also predicted that,  
163 in ABRs evoked by paired clicks, green treefrogs would show faster recovery of responses to the  
164 second click and shorter minimum resolvable ICIs than gray treefrogs, because tracking the faster  
165 modulation rates in the green treefrog advertisement call should require greater temporal resolution.

166 The *sex-specific adaptation hypothesis* holds that males should exhibit greater selectivity than  
167 females for the temporal features of conspecific aggressive calls. This hypothesis follows from the  
168 inference that aggressive calls, which are used in male-male interactions, are more behaviorally  
169 salient to males than females. According to this hypothesis, we predicted that a species  $\times$  sex  $\times$   
170 modulation rate interaction would influence the shape of MRTFs. In gray treefrogs, the temporal  
171 modulations present in aggressive calls (50 to 100 pulses/s) are slightly faster than those in  
172 advertisement calls (40 to 65 pulses/s); therefore, we predicted MRTFs for male gray treefrogs would  
173 be skewed toward faster modulation rates than those of conspecific females (i.e. relatively larger  
174 ASSRs between 50 and 100 Hz in males). In response to paired clicks, we also predicted male gray  
175 treefrogs, compared with conspecific females, would have faster ABR recovery and shorter minimum  
176 resolvable ICIs. In green treefrogs, aggressive calls exhibit temporal modulations at rates between 39  
177 and 56 pulses/s; therefore, we predicted male green treefrogs would have greater ASSRs than  
178 conspecific females at modulation rates near 50 Hz. Given that the modulations in advertisement calls  
179 of green treefrogs are actually faster than those in male-male aggressive calls, we predicted either no  
180 sex difference or relatively faster ABR recovery and shorter minimum resolvable ICIs in females than  
181 males in this species.

182

## 183 **Results**

### 184 *Species-specific adaptation hypothesis*

185 As in many other animals, the MRTFs for both treefrog species decreased as modulation rate  
186 increased (Fig. 5). The effect of modulation rate was significant, and it also had a large effect size  
187 compared to the other effects (Table 1). There was no significant main effect of species; however, the  
188 species  $\times$  modulation rate interaction was significant (Table 1). The effects of this interaction can be  
189 seen in that each species had larger ASSRs than the other at modulation rates typical of conspecific  
190 calls, a result consistent with our predictions. For example, at modulation rates of 25 to 100 Hz, gray  
191 treefrogs had significantly larger responses than green treefrogs when stimuli had the highest carrier

192 frequency (Table 2; Fig. 5). In contrast, green treefrogs had larger ASSRs than gray treefrogs at  
 193 higher modulation rates (e.g. 200 and 400 Hz) for most carrier frequencies (Fig. 5). The difference  
 194 was significant for responses to modulation rates of 200 Hz at all carrier frequencies (Table 2).

195 Recovery increased as a function of increasing ICI (Table 3), and these functions were overall  
 196 very similar in shape between the two species (Fig. 6a). There was no significant effect of species on  
 197 recovery, nor were there significant effects of any of the interactions involving species (Table 3). This  
 198 result was inconsistent with our predictions. On average, however, green treefrogs were able to  
 199 resolve slightly shorter ICIs than gray treefrogs ( $F_{1,61} = 5.7$ ,  $p = 0.020$ , partial  $\eta^2 = 0.09$ ), a result that  
 200 was consistent with our prediction. The average minimum resolvable ICI was ( $\bar{X} \pm \text{s.e.m.}$ )  $1.6 \pm 0.1$   
 201 ms for green treefrogs and  $2.0 \pm 0.1$  ms for gray treefrogs.

### 202 *Sex-specific adaptation hypothesis*

203 Overall, MRTFs were similar between the sexes in both gray treefrogs (Fig. 7a) and green treefrogs  
 204 (Fig. 7b). In contrast to our predictions, the species  $\times$  sex  $\times$  modulation rate interaction was not  
 205 significant (Table 1). Hence, there was no evidence of larger responses in male gray treefrogs than  
 206 female gray treefrogs at modulation rates between 50 and 100 Hz, nor did male green treefrogs have  
 207 larger responses than conspecific females at modulation rates of 50 Hz. There was, however, a  
 208 significant sex  $\times$  modulation rate  $\times$  carrier frequency interaction (Table 1). In response to the middle  
 209 carrier frequency, females of both species consistently had larger ASSRs than males, a difference that  
 210 reached significance in response to stimuli with modulation rates between 50 and 400 Hz (Table 2;  
 211 Fig. 7). Responses to stimuli at the middle carrier frequency overall tended to be larger for females  
 212 and smaller for males than corresponding responses to stimuli with the low or high carrier frequency.

213 Inconsistent with our predictions, recovery functions differed little between the two sexes  
 214 (Fig. 6b). Subject sex did not have a significant effect on percent recovery, and the interaction of sex  
 215 with ICI was also not significant (Table 3). There was no sex-difference in minimum resolvable ICI  
 216 ( $F_{1,61} = 0.5$ ,  $p = 0.469$ , partial  $\eta^2 = 0.01$ ), nor was there an interaction between species and sex ( $F_{1,61} =$   
 217  $0.2$ ,  $p = 0.666$ , partial  $\eta^2 < 0.01$ ).

### 218 **Discussion**

219  
 220 Our results provide robust support for the species-specific adaptation hypothesis, and no support for  
 221 the sex-specific adaptation hypothesis. The key to uncovering evidence supporting the species-  
 222 specific adaptation hypothesis was our comparisons of two species with calls having quite different  
 223 temporal structures (see Fig. 1). Cope's gray treefrogs have pulsatile advertisement calls, with pulse  
 224 rates ranging between 40 and 65 pulses/s, whereas the advertisement calls of green treefrogs exhibit  
 225 temporal modulation at higher rates between 100 pulses/s and 400 cycles/s. While the aggressive calls  
 226 of gray treefrogs are modulated at faster rates than their advertisement calls, these modulations are  
 227 slower than the fastest rates in the advertisement and aggressive calls of green treefrogs. At low  
 228

229 modulation rates (e.g. near 50 Hz), gray treefrogs tended to have relatively larger ASSRs than green  
230 treefrogs, especially in response to stimuli with the highest carrier frequency. In contrast to gray  
231 treefrogs, green treefrogs tended to have relatively larger ASSRs at higher modulation rates (e.g. 200  
232 Hz), a result consistent across carrier frequencies. Green treefrogs also had relatively shorter  
233 minimum resolvable ICIs compared with gray treefrogs. Together, these results based on ASSRs and  
234 ABRs suggest gray treefrogs are adapted to process the relatively slower modulation rates found in  
235 their calls, whereas green treefrogs are adapted to tracking the relatively faster pulse rates and  
236 periodicities in their calls.

237       Species differences in ASSR amplitudes depended on carrier frequency in gray treefrogs, but  
238 not green treefrogs, as indicated by the species  $\times$  modulation rate  $\times$  carrier frequency interaction. This  
239 finding is noteworthy, as it suggests specializations in temporal processing related to differences in  
240 how the spectral properties of the two species' vocalizations are transduced. Recall that in both  
241 species, each of the two spectral peaks in the advertisement call is primarily transduced by one of the  
242 two inner ear sensory papillae (the AP or the BP) (Buerkle et al., 2014; Capranica and Moffat, 1983;  
243 Gerhardt, 1974c; Hillery, 1984; Schrode et al., 2014). In gray treefrog advertisement calls, the relative  
244 amplitude of the high spectral peak (2.5 kHz) is approximately 11 dB greater than the low spectral  
245 peak (1.25 kHz; Ward et al., 2013). Hence, the majority of the acoustic energy in gray treefrog calls  
246 falls in the frequency range of the BP. This is relevant because gray treefrogs were better than green  
247 treefrogs at processing the *slower* modulation rates typical of gray treefrog advertisement calls only at  
248 the high carrier frequencies transduced primarily by the BP. In contrast to gray treefrogs, the low and  
249 high spectral peaks of green treefrog calls have comparable relative amplitudes; therefore, both the  
250 AP and the BP transduce prominent spectral peaks in green treefrog calls. Green treefrogs were  
251 relatively better than gray treefrogs at processing the *faster* modulation rates typical of green treefrog  
252 advertisement calls at both the low and the high carrier frequencies transduced primarily by the AP  
253 and BP, respectively. Our data, therefore, suggest that species-specific adaptations in temporal  
254 processing may be closely tied to potential species-differences in the roles of the two sensory papillae  
255 in processing spectral information in conspecific vocalizations. At present, the specific mechanism  
256 underlying the species  $\times$  modulation rate  $\times$  carrier frequency interaction remains unknown and should  
257 be investigated further in future studies.

258       The species-specific adaptations identified in the present study are consistent with the idea  
259 that sensory systems are specially adapted to process the temporal patterns of common or behaviorally  
260 important natural stimuli. Adaptation of sensory systems to salient stimuli can improve efficiency and  
261 accuracy of neural processing (Atick, 1992; Barlow, 1961; Hateren, 1992; Laughlin, 1981; Simoncelli  
262 and Olshausen, 2001). In the case of treefrogs communicating acoustically in cacophonous breeding  
263 choruses, adaptation of the auditory systems to process the temporal patterns of present in conspecific  
264 calls could improve the neural encoding of these signals, while reducing masking and acoustic  
265 interference by the calls of syntopically breeding heterospecifics. These improvements could facilitate



266 detection of and discrimination between conspecific calls, impacting both mate choice decisions by  
267 females and disputes between males over calling sites.

268 Species-specific adaptations of temporal processing in the auditory system have been recently  
269 identified in songbirds, another group of vocal animals. The responses of neurons in the auditory  
270 midbrains of zebra finches (*Taeniopygia guttata*) were found to synchronize to the temporal  
271 envelopes of SAM noise across a range of modulation rates that closely match the modulations in  
272 conspecific songs (Woolley and Casseday, 2005). The tuning of cells in the midbrain to the temporal  
273 properties of sounds is also context-dependent. Temporal tuning tended to be sharper in response to  
274 conspecific song stimuli compared to behaviorally neutral noise stimuli, even when the modulations  
275 contained in the stimuli were similar (Woolley et al., 2006). Woolley et al. (2005) identified a  
276 mismatch between the best temporal tuning of neurons in both the auditory midbrain and forebrain  
277 areas and the typical modulation rates in conspecific songs. When considering the average response of  
278 neurons in the auditory midbrain and also forebrain areas, the strength of temporal tuning increased as  
279 a function of modulation rate, while the power of the modulations occurring in conspecific song  
280 decreased as a function of modulation rate (Woolley et al., 2005). This pattern of tuning has the effect  
281 of attenuating common modulations and amplifying modulations that vary between conspecific songs,  
282 potentially increasing the discriminability of songs (Woolley et al., 2005).

283 An important implication of the results of the present study is that species-specific adaptations  
284 in temporal processing might occur as early as the auditory periphery in frogs. In both gray treefrogs  
285 and green treefrogs, MRTFs based on ASSR magnitudes were nearly log-linear with respect to  
286 modulation rate, with responses decreasing as a function of increasing modulation rate. The ASSR is a  
287 measure of neural synchronization, with a strong component originating in auditory nerve fibers  
288 (Henry and Lucas, 2008; Supin and Popov, 1995b). The shapes of MRTFs in this study are consistent  
289 with previous studies of auditory nerve fibers in frogs, which have also reported decreasing neural  
290 synchronization as a function of increasing modulation rate (Dunia and Narins, 1989; Feng et al.,  
291 1991; Rose and Capranica, 1985). Our data on ABRs in response to double-click stimuli also support  
292 the idea that species differences in temporal processing might arise as early as the auditory periphery.  
293 The primary generator of the first peak (P1) in the ABRs of all animals studied to date is the auditory  
294 nerve (Achor and Starr, 1980; Brown-Borg et al., 1987; Buchwald and Huang, 1975; Lev and  
295 Sohmer, 1972; Seaman, 1991). The timing of P1 of the ABR in both gray and green treefrogs  
296 corresponds well to the expected latencies of anuran auditory nerve fibers (Buerkle et al., 2014;  
297 Schrode et al., 2014). In support of this view, the minimum resolvable ICIs of between 1.5 and 2.0 ms  
298 measured in the present study are comparable to the average gap detection times of between 1.2 and  
299 2.2 ms reported previously for anuran auditory nerve fibers (Feng et al., 1994). Our results, therefore,  
300 support the hypothesis that the well-known adaptations of the frog peripheral auditory system for  
301 processing natural sounds in the spectral domain may also extend to processing in the temporal  
302 domain.

303 It is potentially surprising that species-specific adaptations in temporal processing might arise  
304 in the periphery, because the peripheral auditory system is generally considered to function as a  
305 lowpass envelope filter (Carney, 1993; Dau et al., 1996; Dolphin et al., 1995; Frisina, 2001).  
306 However, adaptations of the peripheral auditory system for particular modulation rates have been  
307 identified in at least one previous study. In a comparison of three species of songbirds, Henry and  
308 Lucas (2008) found that the two species whose vocalizations contained the fastest modulations also  
309 exhibited larger ASSRs than the third species, particularly at rates faster than 950 Hz. These results  
310 suggested coevolution of temporal resolution and temporal modulations in conspecific vocalizations.  
311 We believe the current study presents the first evidence in favor of species-specific adaptations for  
312 processing temporal patterns in conspecific signals at the level of the auditory periphery in anurans.  
313 Future comparative work using electrophysiological recordings from single auditory nerve fibers in  
314 both gray treefrogs and green treefrogs will be required to confirm this hypothesis.

315 Our demonstration of species differences in temporal processing also sheds important light on  
316 potential auditory mechanisms related to the so-called “cocktail party problem” (McDermott 2009). In  
317 both humans and frogs, the background noise levels characteristic of large social aggregations  
318 fluctuate in amplitude. Human listeners can take advantage of brief “dips” in noise levels to catch  
319 acoustic glimpses of target signals of interest (Bacon et al., 1998; Cooke, 2006; Füllgrabe et al., 2006;  
320 Vestergaard et al., 2011). This ability is known as “dip listening,” and it is thought to be dependent on  
321 having auditory temporal resolution sufficient to resolve the fluctuations in the background noise  
322 (Festen, 1993; Qin and Oxenham, 2003). Recent comparative psychophysical studies of gray and  
323 green treefrogs uncovered a species difference in their abilities to recognize conspecific advertisement  
324 calls in the presence of temporally-fluctuating noise (Vélez and Bee, 2010, 2011, 2013; Vélez et al.,  
325 2012). Gray treefrogs, but not green treefrogs, were able to listen in dips to achieve a release from  
326 auditory masking by chorus-like noises that fluctuated in amplitude over time. Based on this  
327 behavioral difference between the two species, we would have expected gray treefrogs to have better  
328 temporal resolution than green treefrogs. However, our results do not support this conclusion and  
329 possibly suggest precisely the opposite pattern. A relatively larger ASSR indicates greater synchrony  
330 of neural responses, an important component of temporal resolution. Across the modulation rates  
331 tested, for each species there were instances when it had larger ASSRs than the other species.  
332 However, several factors suggest that green treefrogs have better temporal resolution than gray  
333 treefrogs. Green treefrogs had larger ASSRs than gray treefrogs in response to far more stimulus  
334 conditions, and furthermore, they tended to have larger ASSRs at faster modulation rates, indicating  
335 an ability to synchronize to and resolve faster modulation rates. Green treefrogs also had shorter  
336 minimum resolvable ICIs based on ABRs than gray treefrogs. Thus, the species-differences in  
337 temporal processing that might exist at the level of the auditory periphery reported in the present  
338 study appear poorly suited to explain the differences in dip listening abilities previously described for

339 these two species. The present study, therefore, highlights the potentially important role of central  
340 auditory processes in solving cocktail-party-like communication problems.

341 A final important result from this study is that it failed to uncover evidence for sex differences  
342 in temporal processing. We saw no evidence that males had relatively larger ASSRs than females at  
343 modulation rates typical of conspecific aggressive calls, nor was there evidence for a sex-difference in  
344 percent recovery functions based on ABRs. Instead, we observed frequency-dependent sex differences  
345 in which females tended to have relatively larger ASSRs than males at the middle carrier frequency.  
346 Previous behavioral studies (Gerhardt, 2005) and recordings of AEPs (Buerkle et al., 2014; Schrode et  
347 al., 2014) in treefrogs indicate that sound frequencies between the two spectral peaks of advertisement  
348 calls, and correspondingly between the two frequency regions of greatest auditory sensitivity, are able  
349 to simultaneously stimulate both auditory papillae in the anuran inner ear. The observation of larger  
350 ASSRs in females suggests better recruitment of nerve fibers across the two papillae in females than  
351 males. This result is consistent with previous results from recordings of AEPs in these species  
352 (Buerkle et al., 2014; Schrode et al., 2014). In those studies, the amplitudes of P1 of tone-evoked  
353 ABRs were larger in females than males when tones had intermediate frequencies (1.5 to 2.0 kHz). At  
354 present it remains unclear whether this frequency-dependent sex-difference in responses is indicative  
355 of an evolutionary adaptation related to some aspect of spectral or temporal processing.

356

## 357 **Materials and methods**

### 358 *Subjects*

359 Subjects were 68 gray treefrogs (35 female) and 59 green treefrogs (30 female). Gray treefrogs were  
360 collected from Carver Park Reserve (Carver County, MN, USA), Crow-Hassan Park Reserve  
361 (Hennepin County, MN, USA), or Lake Maria State Park (Wright County, MN). Green treefrogs were  
362 collected from the East Texas Conservation Center (Jasper County, TX, USA). All frogs were  
363 collected in amplexus during their respective breeding seasons in either 2011 or 2012. Female gray  
364 treefrogs ( $X \pm \text{s.d.}$ : mass =  $5.2 \pm 1.0$  g; SVL =  $39.3 \pm 2.7$  mm) tended to be larger than male gray  
365 treefrogs ( $4.2 \pm 0.8$  g;  $35.8 \pm 1.9$  mm). In green treefrogs, females ( $7.4 \pm 1.5$  g;  $49.4 \pm 3.0$  mm) and  
366 males ( $7.2 \pm 1.4$  g;  $48.0 \pm 3.2$  mm) were similar in size. After collection, frogs were transported to the  
367 laboratory, where they were housed in terraria on a 12-hour light/dark cycle at ambient room  
368 temperature ( $20 \pm 2^\circ\text{C}$ ). We supplied frogs with fresh water and a regular diet of vitamin-dusted  
369 crickets. We tested each subject within three weeks of collection. All animals were collected with  
370 permission from the Minnesota Department of Natural Resources (permit #s 17892 & 19061) and  
371 Texas Parks and Wildlife (permit # SPR-0410-054) and treated according to protocols approved by  
372 the Institutional Animal Care and Use Committee of the University of Minnesota (#1103A97192).

373

### 374 *General procedures*

375 Equipment and procedures for recording AEPs have been described previously (Buerkle et al., 2014;  
376 Schrode et al., 2014). Briefly, we generated all digital stimuli (50 kHz sampling rate, 16-bit) in TDT  
377 SigGenRP software (Tucker Davis Technologies, Alachua, FL, USA). TDT BioSigRP software  
378 coordinated stimulus output and neural recording through TDT System 3 hardware. Stimuli were  
379 broadcast through an Orb Mod 1 speaker (Orb Audio, New York, NY, USA), which was driven by a  
380 Crown XLS 202 amplifier (Crown Audio, Inc., Elkhart, IN, USA).

381 Recordings were made inside a MAC-3 radio-shielded mini-acoustical chamber (W × D × H:  
382 81.3 cm × 61 cm × 61 cm; Industrial Acoustics Company, Bronx, NY, USA). For recordings, we first  
383 immobilized subjects with an intra-muscular injection of d-tubocurarine chloride (3-12 µg/g body  
384 weight). Subjects were loosely wrapped in a thin piece of moistened gauze to facilitate cutaneous  
385 respiration and seated in a natural position on an acoustically transparent platform, facing the speaker.  
386 Temperature was monitored via a Miller & Weber quick-reading thermometer placed against the  
387 subject's body wall and ranged between 18.0 and 20.0 °C across recording sessions. We have  
388 observed gray treefrogs in amplexus at temperatures between 14 and 23°C and green treefrogs in  
389 amplexus at temperatures between 17 and 26°C. We placed subjects so that the rostral edges of their  
390 tympana were 30 cm from the face of the speaker. We applied a topical anesthetic (2.5% lidocaine  
391 HCl) to the scalp of the subject prior to inserting the tips of three subcutaneous electrodes (1-5 kΩ)  
392 under the skin. The recording electrode was located between the eyes and the ground and inverting  
393 electrodes were placed adjacent to the two tympana. Neural signals were sampled at a rate of 25 kHz,  
394 digitized, and amplified before being transmitted via optic fiber cable to a TDT RZ5 processor and  
395 stored for offline analysis. On the rare occasion that a recording was contaminated with an obvious  
396 artifact (e.g. due to infrequent buccal pumping motion), that recording was repeated.

397

#### 398 *Auditory steady-state responses (ASSRs) to modulated tones*

399 We generated AM tones by multiplying two sinusoids, one serving as the modulator (100%  
400 modulation depth), and the second serving as the carrier signal. Tones were modulated in 1-octave  
401 steps at rates of 12.5, 25, 50, 100, 200, 400, and 800 Hz and were of a sufficient duration to ensure  
402 that subjects heard at least 10 modulation cycles at each modulation rate. Tones with modulation rates  
403 of 12.5 Hz had a duration of 800 ms. All other tones had durations of 400 ms. We used three different  
404 carrier frequencies for each species (1.25, 1.625, and 2.5 kHz for gray treefrogs; 0.9, 1.6, and 2.7 kHz  
405 for green treefrogs). The low and high carrier frequencies for each species corresponded to  
406 frequencies prominent in conspecific advertisement calls (Gerhardt, 1974a; Gerhardt, 1974b; Schrode  
407 et al., 2012), and both species tend to be most sensitive to these two frequencies (Buerkle et al., 2014;  
408 Hillery, 1984; Lombard and Straughan, 1974; Miranda and Wilczynski, 2009; Penna et al., 1992;  
409 Schrode et al., 2014). The middle carrier frequency for each species was chosen because it  
410 simultaneously excites the AP and BP at high signal levels (Buerkle et al., 2014; Gerhardt, 2005;

411 Schrode et al., 2014). In Fig. 2 we show six cycles of example stimuli used to elicit ASSRs from  
412 green treefrogs.

413 Calibration of signal level was a two-step process. We first calibrated 1-s (unmodulated) tones  
414 with frequencies matching the carrier frequencies of the AM tones to 70 dB SPL (re 20  $\mu$ Pa, C-  
415 weighted, fast RMS), using the microphone of a Larson Davis System 824 sound level meter (Larson  
416 Davis, Depew, NY, USA) placed at the approximate location of the frog's head and facing the  
417 speaker. We then matched the peak-to-peak amplitudes of each AM tone to that of the calibrated,  
418 unmodulated tone of corresponding frequency. The frequency response of the speaker was flat ( $\pm 1$   
419 dB) across the range of frequencies tested.

420 We recorded two ASSRs to each stimulus from 30 gray treefrogs (15 females) and 30 green  
421 treefrogs (15 females); examples from a green treefrog are shown in Fig. 2. Each ASSR consisted of  
422 the average of the responses to 400 presentations of the stimulus. We randomized carrier frequencies  
423 and modulation rates of 25 – 800 Hz for each subject. Because of their long duration, tones modulated  
424 at a rate of 12.5 Hz were presented in a separate block prior to or following tones modulated at other  
425 rates. The timing of the 12.5-Hz block (either before or after the other recordings) and the carrier  
426 frequency of tones within the block, were randomized for each subject. Recordings of responses to  
427 stimuli were notch-filtered at 60 Hz (roll-off: 18 dB/octave) to reduce electrical noise and low-pass  
428 filtered at 3 kHz (roll-off: 6 dB/octave). The notch filter was wide enough to attenuate the amplitudes  
429 of recorded responses to stimuli with modulation rates of 50 Hz, but it did so equally for both species  
430 and both sexes.

431 In our statistical tests of the species-specific and sex-specific adaptation hypotheses, we only  
432 considered evoked responses to occur when the peak of the frequency spectrum of the response at the  
433 modulation rate of the stimulus was significantly higher than background noise. We accomplished this  
434 as follows. First, we determined the frequency spectrum of each ASSR (Fig. 2) by averaging over the  
435 two replicate responses to a given stimulus and then performing an FFT analysis (8192 point) over the  
436 first 400 ms of the response. The duration of this analysis window was chosen to achieve a frequency  
437 resolution suitable for the modulation rates tested, and it ensured inclusion of an integer number of  
438 cycles of the modulation stimulus, which is important for avoiding errors in the calculated frequency  
439 spectrum (Herdman and Stapells, 2001; John and Picton, 2000; Nachtigall et al., 2007; Supin and  
440 Popov, 1995b). Next, we computed an  $F$  ratio comparing the power at the modulation rate of the  
441 stimulus (e.g., 100 Hz in Fig. 2) to the average power in the 16 FFT bins adjacent to the modulation  
442 rate of the stimulus (Cone-Wesson et al., 2002; Dobie and Wilson, 1996; Gorga et al., 2004; Hall,  
443 2007; Herdman and Stapells, 2001; Korczak et al., 2012; Picton et al., 2003; Purcell et al., 2004;  
444 Valdes et al., 1997; van der Reijden et al., 2005). Bins were approximately 3 Hz in width, so the  
445 background noise was estimated for a range of about 48 Hz surrounding the modulation rate of the  
446 stimulus. An evoked ASSR was considered to have occurred if the corresponding  $F$  ratio exceeded the  
447 critical value of  $F_{2,32}$  at  $\alpha = 0.05$  (where the degrees of freedom in the numerator and denominator are

448 2 times the number of frequency bins used to estimate the signal and noise magnitudes, respectively).  
449 We repeated this analysis using time windows that included a fixed number of cycles of each  
450 amplitude modulation (10 cycles), rather than fixed time windows (in ms). The same pattern of results  
451 noted in the text was present in the results following this alternative analysis method, so we present  
452 only the results of the analysis with a fixed time window.

453 We investigated the effects of species, sex, modulation rate, and carrier frequency on evoked  
454 ASSRs using a linear mixed model in R (R Development Core Team, 2014), which we fitted using the  
455 lme4 (Bates et al., 2014) and afex (Singmann, 2014) packages. Our model included species, sex,  
456 modulation rate, and carrier frequency as fixed factors, all two-way interactions, and the three-way  
457 interactions of modulation rate  $\times$  carrier frequency with both species and sex. We performed Tukey  
458 post-hoc contrasts using the lsmeans package (Lenth, 2014) to compare between levels of different  
459 factors in the model. A significance criterion of  $\alpha = 0.05$  was used for all analyses.

460

#### 461 *Auditory brainstem responses (ABRs) to paired-clicks*

462 Click stimuli (0.1-ms duration) output through our setup had a broadband spectrum, with a center  
463 frequency of approximately 1.6 kHz and 6-dB down points of approximately 0.345 and 2.8 kHz.  
464 Paired-clicks consisted of two acoustic clicks, separated by a specified ICI. Examples are illustrated in  
465 Fig. 3a. We tested ICIs of 0.5 ms, 0.75 ms, and 1 to 10 ms, in 1-ms steps, with presentation order  
466 randomized between subjects. Each presentation of a paired-click stimulus was followed by at least 40  
467 ms of silence and then a single-click stimulus. We recorded two replicate ABRs to the paired-click  
468 and single-click stimuli, with each replicate consisting of the average response to 1200 presentations  
469 of the stimulus. There was a silent interval of at least 40 ms between the single click and the onset of  
470 the next stimulus presentation. Click polarity was constant for all three clicks within a presentation,  
471 but alternated between each presentation to reduce the microphonic potential. Clicks were calibrated  
472 to 80 dB by matching the peak-to-peak amplitude of each click to that of a calibrated 1-s tone with a  
473 frequency of 1000 Hz.

474 We recorded ABRs to paired-clicks from 38 gray treefrogs (20 females) and 29 green  
475 treefrogs (15 females) (see Fig. 3b). At relatively long ICIs (e.g. 8 ms), separate ABRs to each of the  
476 clicks in the paired-click stimuli were usually evident (Fig. 3b,c). However, at shorter ICIs, the ABRs  
477 evoked by the first and second clicks overlapped in time. To disambiguate these overlapping ABRs,  
478 we derived the response to the second click by aligning the responses to the single and paired clicks at  
479 stimulus onset and then subtracting, point-by-point, the first 25 ms of the average response to the  
480 single-click from the average response to the paired-click. This subtraction effectively removed any  
481 ABR evoked by the first click of the pair, leaving only the residual ABR evoked by the second click  
482 (Fig. 3c). Using a custom-written, cursor-based program in Matlab, we measured the amplitude of all  
483 residual ABRs and ABRs evoked by single clicks as the peak-to-peak amplitude from the top of the  
484 first peak (P1) to the bottom of the subsequent trough (see Fig. 4) (Buerkle et al., 2014; Schrode et

485 al., 2014). If a peak was not visible, we considered the amplitude to be 0  $\mu$ V. These values were used  
486 to calculate the percent recovery as the ratio of the amplitude of a residual ABR to the amplitude of  
487 the ABR evoked by the corresponding single-click. For each subject, we also measured the shortest  
488 resolvable ICI. After plotting residual ABRs as a function of ICI (as in Fig. 3c), we selected the  
489 minimum resolvable ICI as the shortest ICI for which an evoked residual ABR was visually  
490 detectable. We used a repeated-measures ANOVA to investigate the effects of species and sex on  
491 percent recovery. We tested for significant differences in minimum resolvable ICI using a two-way  
492 ANOVA. Species and subject sex were included as fixed factors. We used a significance criterion of  $\alpha$   
493 = 0.05 for both analyses and report p-values corrected based on the Greenhouse-Geisser method  
494 (Greenhouse and Geisser, 1959) where applicable.

495

496 **Acknowledgements** We thank Madeleine Linck, Don Pereira, Ed Quinn, Gary Calkins and  
497 Christopher Maldonado for access to study sites and collection permissions. We also thank many  
498 undergraduate students for help collecting frogs and Dylan Verden and Desiree Schaefer for  
499 technical assistance.

500

501 **Funding** This work was supported by grants from the National Science Foundation (IOS 0842759 to  
502 author M. A. Bee) and the National Institutes of Health (T32GM008471 to T. J. Ebner).

503

504 **Author contributions** KMS and MAB conceived of and designed the experiments, KMS performed  
505 the experiments, and KMS and MAB wrote the paper.

506

507

508 **References**

- 509 **Achor, L. J. and Starr, A.** (1980). Auditory brain stem responses in the cat. I. Intracranial  
510 and extracranial recordings. *Electroencephalography and Clinical Neurophysiology*  
511 **48**, 154–173.
- 512 **Alder, T. B. and Rose, G. J.** (1998). Long-term temporal integration in the anuran auditory  
513 system. *Nat Neurosci* **1**, 519–523.
- 514 **Atick, J. J.** (1992). Could information theory provide an ecological theory of sensory  
515 processing? *Network: Computation in neural systems* **3**, 213–251.
- 516 **Bacon, S. P., Opie, J. M. and Montoya, D. Y.** (1998). The effects of hearing loss and noise  
517 masking on the masking release for speech in temporally complex backgrounds. *J.*  
518 *Speech Lang. Hear. Res.* **41**, 549–563.
- 519 **Barlow, H. B.** (1961). Possible principles underlying the transformation of sensory messages.  
520 In *Sensory communication* (ed. Rosenblith, W. A.), pp. 217–234. Cambridge, MA:  
521 MIT Press.
- 522 **Bates, D., Maechler, M., Bolker, B. and Walker, Steven** (2014). lme4: Linear mixed-  
523 effects models using Eigen and S4. R package version 1.1-5.
- 524 **Bee, M. A.** (2012). Sound source perception in anuran amphibians. *Current Opinion in*  
525 *Neurobiology* **22**, 301–310.
- 526 **Bee, M. A.** (2014). Treefrogs as animal models for research on auditory scene analysis and  
527 the cocktail party problem. *International Journal of Psychophysiology*.
- 528 **Brenowitz, E. A. and Rose, G. J.** (1999). Female choice and plasticity of male calling  
529 behaviour in the Pacific treefrog. *Animal Behaviour* **57**, 1337–1342.
- 530 **Brittan-Powell, E. F., Christensen-Dalsgaard, J., Tang, Y., Carr, C. and Dooling, R. J.**  
531 (2010a). The auditory brainstem response in two lizard species. *J. Acoust. Soc. Am.*  
532 **128**, 787–794.
- 533 **Brittan-Powell, E. F., Dooling, R. J., Ryals, B. and Gleich, O.** (2010b).  
534 Electrophysiological and morphological development of the inner ear in Belgian  
535 Waterslager canaries. *Hearing Research* **269**, 56–69.
- 536 **Brown-Borg, H. M., Beck, M. M. and Jones, T. A.** (1987). Origins of peripheral and  
537 brainstem auditory responses in the white leghorn chick. *Comparative Biochemistry*  
538 *and Physiology Part A: Physiology* **88**, 391–396.
- 539 **Buchwald, J. S. and Huang, C.** (1975). Far-field acoustic response: origins in the cat.  
540 *Science* **189**, 382–384.
- 541 **Buerkle, N. P., Schrode, K. M. and Bee, M. A.** (2014). Assessing stimulus and subject  
542 influences on auditory evoked potentials and their relation to peripheral physiology in  
543 green treefrogs (*Hyla cinerea*). *Comparative Biochemistry and Physiology* **178**, 68–  
544 81.



- 545 **Burkard, R. and Deegan, D.** (1984). Brainstem evoked responses to paired-click stimuli: the  
546 use of digital response subtraction. *International Journal of Audiology* **23**, 85–98.
- 547 **Capranica, R. R. and Moffat, A. J. M.** (1975). Selectivity of the peripheral auditory system  
548 of spadefoot toads (*Scaphiopus couchi*) for sounds of biological significance. *J.*  
549 *Comp. Physiol.* **100**, 231–249.
- 550 **Capranica, R. R. and Moffat, A. J. M.** (1983). Neurobehavioral correlates of sound  
551 communication in anurans. In *Advances in Vertebrate Neuroethology* (ed. Ewert, J.  
552 P., Capranica, R. R., and Ingle, D. J.), pp. 701–730. New York: Plenum Press.
- 553 **Carney, L. H.** (1993). A model for the responses of low-frequency auditory-nerve fibers in  
554 cat. *The Journal of the Acoustical Society of America* **93**, 401–417.
- 555 **Castellano, S. and Rosso, A.** (2006). Variation in call temporal properties and female  
556 preferences in *Hyla intermedia*. *Behaviour* **143**, 405–424.
- 557 **Condon, C. J., Chang, S.-H. and Feng, A. S.** (1991). Processing of behaviorally relevant  
558 temporal parameters of acoustic stimuli by single neurons in the superior olivary  
559 nucleus of the leopard frog. *J Comp Physiol A* **168**, 709–725.
- 560 **Cone-Wesson, B., Dowel, R. C., Tomlin, D., Rance, G. and Wu Jia Ming** (2002). The  
561 auditory steady-state response: Comparisons with the auditory brainstem response.  
562 *Journal of the American Academy of Audiology* **13**, 173.
- 563 **Cooke, M.** (2006). A glimpsing model of speech perception in noise. *J. Acoust. Soc. Am.*  
564 **119**, 1562–1573.
- 565 **Dau, T., Püschel, D. and Kohlrausch, A.** (1996). A quantitative model of the “effective”  
566 signal processing in the auditory system. I. Model structure. *The Journal of the*  
567 *Acoustical Society of America* **99**, 3615–3622.
- 568 **Diekamp, B. and Gerhardt, H. C.** (1995). Selective phonotaxis to advertisement calls in the  
569 gray treefrog *Hyla versicolor*: behavioral experiments and neurophysiological  
570 correlates. *J Comp Physiol A* **177**, 173–190.
- 571 **Dobie, R. A. and Wilson, M. J.** (1996). A comparison of t test, F test, and coherence  
572 methods of detecting steady-state auditory-evoked potentials, distortion-product  
573 otoacoustic emissions, or other sinusoids. *The Journal of the Acoustical Society of*  
574 *America* **100**, 2236–2246.
- 575 **Dolphin, W. F. and Mountain, D. C.** (1992). The envelope following response: Scalp  
576 potentials elicited in the mongolian gerbil using sinusoidally AM acoustic signals.  
577 *Hearing Research* **58**, 70–78.
- 578 **Dolphin, W. F., Chertoff, M. E. and Burkard, R.** (1994). Comparison of the envelope  
579 following response in the Mongolian gerbil using two-tone and sinusoidally  
580 amplitude-modulated tones. *The Journal of the Acoustical Society of America* **96**,  
581 2225–2234.

- 582 **Dolphin, W. F., Au, W. W. L., Nachtigall, P. E. and Pawloski, J.** (1995). Modulation rate  
583 transfer functions to low-frequency carriers in three species of cetaceans. *J Comp*  
584 *Physiol A* **177**, 235–245.
- 585 **Dunia, R. and Narins, P. M.** (1989). Temporal resolution in frog auditory-nerve fibers. *The*  
586 *Journal of the Acoustical Society of America* **85**, 1630–1638.
- 587 **Edwards, C. J., Alder, T. B. and Rose, G. J.** (2002). Auditory midbrain neurons that count.  
588 *Nat Neurosci* **5**, 934–936.
- 589 **Eggermont, J. J.** (1990). Temporal modulation transfer functions for single neurons in the  
590 auditory midbrain of the leopard frog. Intensity and carrier-frequency dependence.  
591 *Hearing Research* **43**, 181–198.
- 592 **Feng, A. S., Hall, J. C. and Siddique, S.** (1991). Coding of temporal parameters of complex  
593 sounds by frog auditory nerve fibers. *J Neurophysiol* **65**, 424–445.
- 594 **Feng, A. S., Lin, W.-Y. and Sun, L.** (1994). Detection of gaps in sinusoids by frog auditory  
595 nerve fibers: importance in AM coding. *J Comp Physiol A* **175**, 531–546.
- 596 **Festen, J. M.** (1993). Contributions of comodulation masking release and temporal  
597 resolution to the speech-reception threshold masked by an interfering voice. *The*  
598 *Journal of the Acoustical Society of America* **94**, 1295–1300.
- 599 **Finneran, J. J., London, H. R. and Houser, D. S.** (2007). Modulation rate transfer  
600 functions in bottlenose dolphins (*Tursiops truncatus*) with normal hearing and high-  
601 frequency hearing loss. *J Comp Physiol A* **193**, 835–843.
- 602 **Frishkopf, L. S., Capranica, R. R. and Goldstein, M.H., J.** (1968). Neural coding in the  
603 bullfrog's auditory system a teleological approach. *Proceedings of the IEEE* **56**, 969 –  
604 980.
- 605 **Frisina, R. D.** (2001). Subcortical neural coding mechanisms for auditory temporal  
606 processing. *Hearing Research* **158**, 1–27.
- 607 **Füllgrabe, C., Berthommier, F. and Lorenzi, C.** (2006). Masking release for consonant  
608 features in temporally fluctuating background noise. *Hearing Research* **211**, 74–84.
- 609 **Fuzessery, Z. M. and Feng, A. S.** (1982). Frequency selectivity in the anuran auditory  
610 midbrain: Single unit responses to single and multiple tone stimulation. *J. Comp.*  
611 *Physiol.* **146**, 471–484.
- 612 **Fuzessery, Z. M. and Feng, A. S.** (1983). Mating call selectivity in the thalamus and  
613 midbrain of the leopard frog (*Rana p. pipiens*): Single and multiunit analyses. *J.*  
614 *Comp. Physiol.* **150**, 333–344.
- 615 **Gall, M. D., Henry, K. S. and Lucas, J. R.** (2012). Two measures of temporal resolution in  
616 brown-headed cowbirds (*Molothrus ater*). *J Comp Physiol A* **198**, 61–68.
- 617 **Gall, M. D., Salameh, T. S. and Lucas, J. R.** (2013). Songbird frequency selectivity and  
618 temporal resolution vary with sex and season. *Proc. R. Soc. B* **280**, 20122296.

- 619 **Garton, J. S. and Brandon, R. A.** (1975). Reproductive Ecology of the Green Treefrog,  
620 *Hyla cinerea*, in Southern Illinois (Anura: Hylidae). *Herpetologica* **31**, 150–161.
- 621 **Gerhardt, H. C.** (1974a). Behavioral isolation of the tree frogs, *Hyla cinerea* and *Hyla*  
622 *andersonii*. *American Midland Naturalist* **91**, 424–433.
- 623 **Gerhardt, H. C.** (1974b). Mating call differences between eastern and western populations  
624 of the treefrog *Hyla chrysoscelis*. *Copeia* **1974**, 534–536.
- 625 **Gerhardt, H. C.** (1974c). The Significance of Some Spectral Features in Mating Call  
626 Recognition in the Green Treefrog (*Hyla Cinerea*). *J Exp Biol* **61**, 229–241.
- 627 **Gerhardt, H. C.** (1978). Mating call recognition in the green treefrog (*Hyla Cinerea*): The  
628 significance of some fine-temporal properties. *J Exp Biol* **74**, 59–73.
- 629 **Gerhardt, H. C.** (1982). Sound pattern recognition in some North American treefrogs  
630 (Anura: Hylidae): Implications for mate choice. *Amer. Zool.* **22**, 581–595.
- 631 **Gerhardt, H. C.** (2001). Acoustic communication in two groups of closely related treefrogs.  
632 In *Advances in the Study of Behavior* (ed. Peter J. B. Slater, J. S. R., Charles T.  
633 Snowdon and Timothy J. Roper), pp. 99–167. Academic Press.
- 634 **Gerhardt, H. C.** (2005). Acoustic spectral preferences in two cryptic species of grey  
635 treefrogs: implications for mate choice and sensory mechanisms. *Animal Behaviour*  
636 **70**, 39–48.
- 637 **Gerhardt, H. C. and Doherty, J. A.** (1988). Acoustic communication in the gray treefrog,  
638 *Hyla versicolor*: evolutionary and neurobiological implications. *J. Comp. Physiol.*  
639 **162**, 261–278.
- 640 **Gerhardt, H. C. and Huber, F.** (2002). *Acoustic Communication in Insects and Anurans:*  
641 *Common Problems and Diverse Solutions*. 1st ed. University Of Chicago Press.
- 642 **Gooler, D. M. and Feng, A. S.** (1992). Temporal coding in the frog auditory midbrain: the  
643 influence of duration and rise-fall time on the processing of complex amplitude-  
644 modulated stimuli. *J Neurophysiol* **67**, 1–22.
- 645 **Gorga, M. P., Neely, S. T., Hoover, B. M., Dierking, D. M., Beauchaine, K. L. and**  
646 **Manning, C.** (2004). Determining the upper limits of stimulation for auditory steady-  
647 state response measurements. *Ear Hear* **25**, 302–307.
- 648 **Greenhouse, S. W. and Geisser, S.** (1959). On methods in the analysis of profile data.  
649 *Psychometrika* **24**, 95–112.
- 650 **Hall, J. C.** (1994). Central processing of communication sounds in the anuran auditory  
651 system. *Amer. Zool.* **34**, 670–684.
- 652 **Hall, J. W.** (2007). *New Handbook for Auditory Evoked Responses*. 1st ed. Allyn & Bacon.
- 653 **Hateren, J. H. van** (1992). A theory of maximizing sensory information. *Biol. Cybern.* **68**,  
654 23–29.

- 655 **Henry, K. S. and Lucas, J. R.** (2008). Coevolution of auditory sensitivity and temporal  
656 resolution with acoustic signal space in three songbirds. *Animal Behaviour* **76**, 1659–  
657 1671.
- 658 **Henry, K. S., Gall, M. D., Bidelman, G. M. and Lucas, J. R.** (2011). Songbirds tradeoff  
659 auditory frequency resolution and temporal resolution - Springer. *J Comp Physiol A*  
660 **197**, 351–359.
- 661 **Herdman, A. T. and Stapells, D. R.** (2001). Thresholds determined using the monotonic and  
662 dichotic multiple auditory steady-state response technique in normal-hearing subjects.  
663 *Scandinavian Audiology* **30**, 41–49.
- 664 **Higgs, D., Brittan-Powell, E. F., Soares, D., Souza, M., Carr, C. E., Dooling, R. and**  
665 **Popper, A. N.** (2002). Amphibious auditory responses of the American alligator  
666 (*Alligator mississippiensis*). *J Comp Physiol A* **188**, 217–223.
- 667 **Hillery, C. M.** (1984). Seasonality of two midbrain auditory responses in the treefrog, *Hyla*  
668 *chrysoscelis*. *Copeia* **1984**, 844–852.
- 669 **John, M. S. and Picton, T. W.** (2000). MASTER: a Windows program for recording  
670 multiple auditory steady-state responses. *Computer Methods and Programs in*  
671 *Biomedicine* **61**, 125–150.
- 672 **Katbamna, B., Thodi, C., Senturia, J. B. and Metz, D. A.** (1992). Auditory-evoked  
673 brainstem responses in the hibernating woodchuck *Marmota monax*. *Comparative*  
674 *Biochemistry and Physiology Part A: Physiology* **102**, 513–517.
- 675 **Kenyon, T. N., Ladich, F. and Yan, H. Y.** (1998). A comparative study of hearing ability in  
676 fishes: the auditory brainstem response approach. *Journal of Comparative Physiology*  
677 *A: Neuroethology, Sensory, Neural, and Behavioral Physiology* **182**, 307–318.
- 678 **Klump, G. M., Benedix Jr., J. H., Gerhardt, H. C. and Narins, P. M.** (2004). AM  
679 representation in green treefrog auditory nerve fibers: neuroethological implications  
680 for pattern recognition and sound localization. *J Comp Physiol A* **190**, 1011–1021.
- 681 **Korczak, P., Smart, J., Delgado, R., M. Strobel, T. and Bradford, C.** (2012). Auditory  
682 steady-state responses. *Journal of the American Academy of Audiology* **23**, 146–170.
- 683 **Ladich, F. and Fay, R. R.** (2013). Auditory evoked potential audiometry in fish. *Rev Fish*  
684 *Biol Fisheries* **23**, 317–364.
- 685 **Laughlin, S. B.** (1981). A simple coding procedure enhances a neuron's information  
686 capacity. *Z. Naturforsch* **36**, 910–912.
- 687 **Lenth, R. V.** (2014). lsmeans: Least-Squares Means. R package version 2.00-4.
- 688 **Lev, A. and Sohmer, H.** (1972). Sources of averaged neural responses recorded in animal  
689 and human subjects during cochlear audiometry (Electro-Cochleogram). *Arch. klin.*  
690 *exp. Ohr.-, Nas.- u. Kehlk.Heilk.* **201**, 79–90.
- 691 **Lombard, R. E. and Straughan, I. R.** (1974). Functional aspects of anuran middle ear  
692 structures. *J Exp Biol* **61**, 71–93.

- 693 **Machens, C. K., Gollisch, T., Kolesnikova, O. and Herz, A. V. M.** (2005). Testing the  
694 efficiency of sensory coding with optimal stimulus ensembles. *Neuron* **47**, 447–456.
- 695 **Mann, D. A., Colbert, D. E., Gaspard, J. C., Casper, B. M., Cook, M. L. H., Reep, R. L.**  
696 **and Bauer, G. B.** (2005). Temporal resolution of the Florida manatee (*Trichechus*  
697 *manatus latirostris*) auditory system. *J Comp Physiol A* **191**, 903–908.
- 698 **Marshall, V. T., Humfeld, S. C. and Bee, M. A.** (2003). Plasticity of aggressive signalling  
699 and its evolution in male spring peepers, *Pseudacris crucifer*. *Animal Behaviour* **65**,  
700 1223–1234.
- 701 **Megela, A. L.** (1983). Auditory response properties of the anuran thalamus: nonlinear  
702 facilitation. In *Advances in Vertebrate Neuroethology* (ed. Ewert, J.-P., Capranica, R.  
703 R., and Ingle, D. J.), pp. 895–899. Springer US.
- 704 **Miranda, J. A. and Wilczynski, W.** (2009). Sex differences and androgen influences on  
705 midbrain auditory thresholds in the green treefrog, *Hyla cinerea*. *Hear Res* **252**, 79–  
706 88.
- 707 **Mudry, K. M. and Capranica, R. R.** (1987a). Correlation between auditory thalamic area  
708 evoked responses and species-specific call characteristics. *J. Comp. Physiol.* **161**,  
709 407–416.
- 710 **Mudry, K. M. and Capranica, R. R.** (1987b). Correlation between auditory evoked  
711 responses in the thalamus and species-specific call characteristics. *J. Comp. Physiol.*  
712 **160**, 477–489.
- 713 **Mudry, K. M., Constantine-Paton, M. and Capranica, R. R.** (1977). Auditory sensitivity  
714 of the diencephalon of the leopard frog *Rana p. pipiens*. *J. Comp. Physiol.* **114**, 1–13.
- 715 **Nachtigall, P. E., Mooney, T. A., Taylor, K. A. and Yuen, M. M. L.** (2007). Hearing and  
716 auditory evoked potential methods applied to odontocete cetaceans. *Aquatic Mammals*  
717 **33**, 6–13.
- 718 **Narins, P. M. and Capranica, R. R.** (1976). Sexual differences in the auditory system of the  
719 tree frog *Eleutherodactylus coqui*. *Science* **192**, 378–380.
- 720 **Narins, P. M. and Capranica, R. R.** (1980). Neural adaptations for processing the two-note  
721 call of the Puerto Rican treefrog, *Eleutherodactylus coqui*. *Brain, Behavior and*  
722 *Evolution* **17**, 48–66.
- 723 **Oldham, R. S. and Gerhardt, H. C.** (1975). Behavioral isolating mechanisms of the  
724 treefrogs *Hyla cinerea* and *H. gratiosa*. *Copeia* **1975**, 223–231.
- 725 **Penna, M., Capranica, R. R. and Somers, J.** (1992). Hormone-induced vocal behavior and  
726 midbrain auditory sensitivity in the green treefrog, *Hyla cinerea*. *J Comp Physiol A*  
727 **170**, 73–82.
- 728 **Penna, M., Lin, W.-Y. and Feng, A. S.** (1997). Temporal selectivity for complex signals by  
729 single neurons in the torus semicircularis of *Pleurodema thaul* (Amphibia:  
730 Leptodactylidae). *J Comp Physiol A* **180**, 313–328.

- 731 **Penna, M., Lin, W.-Y. and Feng, A. S.** (2001). Temporal selectivity by single neurons in  
 732 the torus semicircularis of *Batrachyla antartandica* (Amphibia: Leptodactylidae). *J*  
 733 *Comp Physiol A* **187**, 901–912.
- 734 **Picton, T., John, M., Dimitrijevic, A. and Purcell, D.** (2003). Human auditory steady-state  
 735 responses. *International Journal of Audiology* **42**, 177–219.
- 736 **Popov, V. V. and Supin, A. Y.** (1990). Auditory brain stem responses in characterization of  
 737 dolphin hearing. *Journal of Comparative Physiology A: Neuroethology, Sensory,*  
 738 *Neural, and Behavioral Physiology* **166**, 385–393.
- 739 **Purcell, D. W., John, S. M., Schneider, B. A. and Picton, T. W.** (2004). Human temporal  
 740 auditory acuity as assessed by envelope following responses. *The Journal of the*  
 741 *Acoustical Society of America* **116**, 3581–3593.
- 742 **Qin, M. K. and Oxenham, A. J.** (2003). Effects of simulated cochlear-implant processing on  
 743 speech reception in fluctuating maskers. *The Journal of the Acoustical Society of*  
 744 *America* **114**, 446–454.
- 745 **R Development Core Team** (2014). R: A language and environment for statistical  
 746 computing. *R foundation for statistical computing*.
- 747 **Reichert, M. S. and Gerhardt, H. C.** (2014). Behavioral strategies and signaling in  
 748 interspecific aggressive interactions in gray tree frogs. *Behavioral Ecology* **25**, 520–  
 749 530.
- 750 **Rieke, F., Bodnar, D. A. and Bialek, W.** (1995). Naturalistic stimuli increase the rate and  
 751 efficiency of information transmission by primary auditory afferents. *Proc. R. Soc.*  
 752 *Lond. B* **262**, 259–265.
- 753 **Ritke, M. E. and Semlitsch, R. D.** (1991). Mating behavior and determinants of male mating  
 754 success in the gray treefrog, *Hyla chrysoscelis*. *Can. J. Zool.* **69**, 246–250.
- 755 **Rose, G. J. and Brenowitz, E. A.** (2002). Pacific treefrogs use temporal integration to  
 756 differentiate advertisement from encounter calls. *Animal Behaviour* **63**, 1183–1190.
- 757 **Rose, G. J. and Capranica, R. R.** (1984). Processing amplitude-modulated sounds by the  
 758 auditory midbrain of two species of toads: matched temporal filters. *J. Comp. Physiol.*  
 759 **154**, 211–219.
- 760 **Rose, G. J. and Capranica, R. R.** (1985). Sensitivity to amplitude modulated sounds in the  
 761 anuran auditory nervous system. *Journal of Neurophysiology* **53**, 446–465.
- 762 **Rose, G. J. and Gooler, D. M.** (2007). Function of the amphibian central auditory system. In  
 763 *Hearing and Sound Communication in Amphibians* (ed. Narins, P. M., Feng, A. S.,  
 764 Fay, R. R., and Popper, A. N.), pp. 250–290. Springer New York.
- 765 **Rose, G. J., Brenowitz, E. A. and Capranica, R. R.** (1985). Species specificity and  
 766 temperature dependency of temporal processing by the auditory midbrain of two  
 767 species of treefrogs. *J. Comp. Physiol. A* **157**, 763–769.

- 768 **Ryan, M. J., Perrill, S. A. and Wilczynski, W.** (1992). Auditory tuning and call frequency  
 769 predict population-based mating preferences in the cricket frog, *Acris crepitans*. *The*  
 770 *American Naturalist* **139**, 1370–1383.
- 771 **Schrode, K. M., Ward, J. L., Vélez, A. and Bee, M. A.** (2012). Female preferences for  
 772 spectral call properties in the western genetic lineage of Cope’s gray treefrog (*Hyla*  
 773 *chrysoscelis*). *Behav Ecol Sociobiol* **66**, 1595–1606.
- 774 **Schrode, K. M., Buerkle, N. P., Brittan-Powell, E. F. and Bee, M. A.** (2014). Auditory  
 775 brainstem responses in Cope’s gray treefrog (*Hyla chrysoscelis*): effects of frequency,  
 776 level, sex and size. *J Comp Physiol A* **200**, 221–238.
- 777 **Schwartz, J. J.** (1986). Male calling behavior and female choice in the neotropical treefrog  
 778 *Hyla microcephala*. *Ethology* **73**, 116–127.
- 779 **Schwartz, J. J.** (1987). The importance of spectral and temporal properties in species and  
 780 call recognition in a neotropical treefrog with a complex vocal repertoire. *Animal*  
 781 *Behaviour* **35**, 340–347.
- 782 **Schwartz, J. J. and Simmons, A. M.** (1990). Encoding of a spectrally-complex  
 783 communication sound in the bullfrog’s auditory nerve. *J Comp Physiol A* **166**, 489–  
 784 499.
- 785 **Seaman, R. L.** (1991). Method to record evoked potentials from the frog eighth nerve.  
 786 *Hearing Research* **51**, 301–305.
- 787 **Simmons, A. M.** (2013). “To ear is human, to frogive is divine”: Bob Capranica’s legacy to  
 788 auditory neuroethology. *Journal of Comparative Physiology A* **199**, 169–182.
- 789 **Simmons, A. M., Schwartz, J. J. and Ferragamo, M.** (1992). Auditory nerve representation  
 790 of a complex communication sound in background noise. *The Journal of the*  
 791 *Acoustical Society of America* **91**, 2831–2844.
- 792 **Simmons, A. M., Reese, G. and Ferragamo, M.** (1993). Periodicity extraction in the anuran  
 793 auditory nerve. II: Phase and temporal fine structure. *The Journal of the Acoustical*  
 794 *Society of America* **93**, 3374–3389.
- 795 **Simoncelli, E. P. and Olshausen, B. A.** (2001). Natural Image Statistics and Neural  
 796 Representation. *Annual Review of Neuroscience* **24**, 1193–1216.
- 797 **Singh, N. C. and Theunissen, F. E.** (2003). Modulation spectra of natural sounds and  
 798 ethological theories of auditory processing. *J. Acoust. Soc. Am.* **114**, 3394–3411.
- 799 **Singmann, H.** (2014). afex: Analysis of Factorial Experiments. R package version 0.8-94.
- 800 **Smith, E. C. and Lewicki, M. S.** (2006). Efficient auditory coding. *Nature* **439**, 978–982.
- 801 **Suga, N.** (1989). Principles of auditory information-processing derived from neuroethology.  
 802 *J Exp Biol* **146**, 277–286.

- 803 **Supin, A. Y. and Popov, V. V.** (1995a). Temporal resolution in the dolphin's auditory  
804 system revealed by double-click evoked potential study. *The Journal of the Acoustical*  
805 *Society of America* **97**, 2586–2593.
- 806 **Supin, A. Y. and Popov, V. V.** (1995b). Envelope-following response and modulation  
807 transfer function in the dolphin's auditory system. *Hearing Research* **92**, 38–46.
- 808 **Supin, A. Y., Popov, V. V. and Klishin, V. O.** (1993). ABR frequency tuning curves in  
809 dolphins. *Journal of Comparative Physiology A: Neuroethology, Sensory, Neural, and*  
810 *Behavioral Physiology* **173**, 649–656.
- 811 **Valdes, J., Perez-Abalo, M., Martin, V., Savio, G., Sierra, C., Rodriguez, E. and Lins, O.**  
812 (1997). Comparison of statistical indicators for the automatic detection of 80 Hz  
813 auditory steady state responses. *Ear & Hearing October 1997* **18**, 420–429.
- 814 **Van der Reijden, C., Mens, L. H. and Snik, A. F.** (2005). EEG derivations providing  
815 auditory steady-state responses with high signal-to-noise ratios in infants. *Ear &*  
816 *Hearing June 2005* **26**, 299–309.
- 817 **Vélez, A. and Bee, M. A.** (2010). Signal recognition by frogs in the presence of temporally  
818 fluctuating chorus-shaped noise. *Behav Ecol Sociobiol* **64**, 1695–1709.
- 819 **Vélez, A. and Bee, M. A.** (2011). Dip listening and the cocktail party problem in grey  
820 treefrogs: signal recognition in temporally fluctuating noise. *Animal Behaviour* **82**,  
821 1319–1327.
- 822 **Vélez, A., Höbel, G., Gordon, N. M. and Bee, M. A.** (2012). Dip listening or modulation  
823 masking? Call recognition by green treefrogs (*Hyla cinerea*) in temporally fluctuating  
824 noise. *J Comp Physiol A* **198**, 891–904.
- 825 **Vestergaard, M. D., Fyson, N. R. C. and Patterson, R. D.** (2011). The mutual roles of  
826 temporal glimpsing and vocal characteristics in cocktail-party listening. *J. Acoust.*  
827 *Soc. Am.* **130**, 429–439.
- 828 **Walkowiak, W.** (1984). Neuronal correlates of the recognition of pulsed sound signals in the  
829 grass frog. *J. Comp. Physiol.* **155**, 57–66.
- 830 **Walkowiak, W. and Brzoska, J.** (1982). Significance of spectral and temporal call  
831 parameters in the auditory communication of male grass frogs. *Behav Ecol Sociobiol*  
832 **11**, 247–252.
- 833 **Ward, J. L., Love, E. K., Vélez, A., Buerkle, N. P., O'Bryan, L. R. and Bee, M. A.**  
834 (2013). Multitasking males and multiplicative females: dynamic signalling and  
835 receiver preferences in Cope's grey treefrog. *Animal Behaviour* **86**, 231–243.
- 836 **Wells, K. D.** (1977). The social behaviour of anuran amphibians. *Animal Behaviour* **25**, 666–  
837 693.
- 838 **Wells, K. D. and Bard, K. M.** (1987). Vocal communication in a neotropical treefrog, *Hyla*  
839 *Ebraccata*: responses of females to advertisement and aggressive calls. *Behaviour*  
840 **101**, 200–210.



- 841 **Woolley, S. M. N. and Casseday, J. H.** (2005). Processing of Modulated Sounds in the  
842 Zebra Finch Auditory Midbrain: Responses to Noise, Frequency Sweeps, and  
843 Sinusoidal Amplitude Modulations. *Journal of Neurophysiology* **94**, 1143–1157.
- 844 **Woolley, S. M. N., Fremouw, T. E., Hsu, A. and Theunissen, F. E.** (2005). Tuning for  
845 spectro-temporal modulations as a mechanism for auditory discrimination of natural  
846 sounds. *Nat Neurosci* **8**, 1371–1379.
- 847 **Woolley, S. M. N., Gill, P. R. and Theunissen, F. E.** (2006). Stimulus-Dependent Auditory  
848 Tuning Results in Synchronous Population Coding of Vocalizations in the Songbird  
849 Midbrain. *J. Neurosci.* **26**, 2499–2512.
- 850 **Wysocki, L. E. and Ladich, F.** (2002). Can fishes resolve temporal characteristics of  
851 sounds? New insights using auditory brainstem responses. *Hearing Research* **169**, 36–  
852 46.
- 853 **Wysocki, L. E. and Ladich, F.** (2005). Effects of noise exposure on click detection and the  
854 temporal resolution ability of the goldfish auditory system. *Hearing Research* **201**,  
855 27–36.
- 856

857 **FIGURE CAPTIONS**

858 **Fig. 1 Examples of communication calls of gray treefrogs and green treefrogs.** Waveforms of  
 859 advertisement call are shown for (A) gray treefrogs and (B) green treefrogs. Depicted in (C) and (D)  
 860 are waveforms of aggressive calls for gray treefrogs and green treefrogs, respectively. Scale bar in (D)  
 861 applies to all panels. Aggressive call in (C) courtesy of MS Reichert.

862

863 **Fig. 2 Examples of amplitude modulated stimuli and auditory steady state responses (ASSRs).**  
 864 ASSRs (alternatively known as envelope following responses or amplitude modulation following  
 865 responses) were recorded in response to AM tones of three different carrier frequencies for each of the  
 866 two species. The example stimuli shown (top panels) were used with green treefrogs and had a  
 867 modulation frequency of 100 Hz and carrier frequencies of (A) 0.9 kHz, (B) 1.6 kHz, or (C) 2.7 kHz.  
 868 Examples of neural responses from a green treefrog to each stimulus are plotted separately in the time  
 869 (left panels) and frequency (right panels) domains. During recording, signals were notch-filtered at 60  
 870 Hz and low-pass filtered at 3 kHz (roll-off: 6 dB/octave). For the purposes of this figure, responses in  
 871 the time domain have been high-pass filtered (cutoff: 25 Hz, 48 dB/octave) to reveal the periodicity in  
 872 the trace. Note the peak in the frequency spectrum of the response that matches the 100 Hz  
 873 modulation rate of the stimulus. The magnitude of this peak is indicative of how well the auditory  
 874 system followed the AM fluctuation in the envelope of the tone and was used to generate the  
 875 modulation rate transfer functions (MRTFs) depicted in Figs 5 and 7.

876

877 **Fig. 3 Examples of paired-click stimuli and auditory brainstem responses (ABRs).** Subjects were  
 878 tested with pairs of acoustic clicks that varied in inter-click interval (ICI). (A) Shown here are  
 879 examples of paired-click stimuli with ICIs ranging between 0.25 ms and 8 ms. (B) Plotted here are  
 880 examples of ABRs from a green treefrog to the stimuli in (A). (C) To disambiguate responses to  
 881 paired-clicks with short ICIs, residual ABRs in responses to the second click of each click pair in (A)  
 882 were derived by point-to-point subtraction of the ABR elicited by a single click (not shown) from that  
 883 elicited by paired-clicks in (B).

884

885 **Fig. 4 Amplitude of the ABR response to double clicks.** The amplitude of each residual ABR (see  
 886 Fig. 3) to a paired-click stimulus and each response to a single click were measured as the peak-to-  
 887 peak amplitude from the top of P1 (x) to the subsequent trough (-). The example shown here is the  
 888 residual ABR to a paired-click with an ICI of 8 ms. Arrows indicate times of the first and second click  
 889 presentations.

890

891 **Fig. 5 Modulation rate transfer functions (MRTFs) for each species.** An ASSR was measured  
 892 from each recording as the magnitude of the peak in the frequency domain at the frequency equivalent

893 to the modulation rate of the stimulus. Responses are plotted separately for each species across the  
894 three carrier frequencies tested. Inequalities depict the predicted direction of responses for the species-  
895 specific adaptation hypothesis; the shaded regions indicate the range over which differences were  
896 predicted, with overlap in the ranges indicated by diagonal striping. The “low,” “middle,” and “high”  
897 carrier frequencies were, respectively, 1.25 kHz, 1.625 kHz, and 2.5 kHz for gray treefrogs and 0.9  
898 kHz, 1.6 kHz, and 2.7 kHz for green treefrogs. All error bars represent the s.e.m.

899

900 **Fig. 6 Paired-click recovery functions.** Recovery was calculated as the ratio of the peak-to-peak  
901 amplitude (as calculated in Fig. 4) of the residual ABR to the peak-to-peak amplitude of the ABR  
902 elicited by a single click. Recovery is plotted separately for (A) each species and (B) each sex, as a  
903 function of ICI. All error bars represent s.e.m.

904

905 **Fig. 7 Modulation rate transfer functions (MRTFs) for each sex.** ASSRs are plotted as functions of  
906 stimulus modulation rate separately for each sex for (A) gray treefrogs and (B) green treefrogs.  
907 MRTFs are shown separately for the low, middle, and high carrier frequencies (see Fig. 5).  
908 Inequalities depict the predicted direction of responses based on the sex-specific adaptation  
909 hypothesis; the shaded regions indicate the range over which differences were predicted. Error bars  
910 represent the s.e.m.

911

912

913 Table 1 Results of the linear mixed model used to assess effects of species and subject sex on  
 914 ASSRs. Bold indicates significant terms.

| term                                                 | df            | <i>F</i>      | <i>p</i> value   | effect size<br>(partial $\eta^2$ ) |
|------------------------------------------------------|---------------|---------------|------------------|------------------------------------|
| <b>intercept</b>                                     | <b>1,62</b>   | <b>3910.6</b> | <b>&lt;0.001</b> | <b>0.98</b>                        |
| species                                              | 1,62          | 0.2           | 0.629            | 0.00                               |
| <b>sex</b>                                           | <b>1,62</b>   | <b>5.5</b>    | <b>0.022</b>     | <b>0.08</b>                        |
| <b>modulation rate</b>                               | <b>6,768</b>  | <b>215.6</b>  | <b>&lt;0.001</b> | <b>0.63</b>                        |
| carrier frequency                                    | 2,766         | 0.2           | 0.811            | 0.00                               |
| <b>species × modulation rate</b>                     | <b>6,768</b>  | <b>18.4</b>   | <b>&lt;0.001</b> | <b>0.13</b>                        |
| <b>species × carrier frequency</b>                   | <b>2,767</b>  | <b>9.3</b>    | <b>&lt;0.001</b> | <b>0.02</b>                        |
| sex × modulation rate                                | 6,768         | 1.4           | 0.198            | 0.01                               |
| <b>sex × carrier frequency</b>                       | <b>2,766</b>  | <b>19.0</b>   | <b>&lt;0.001</b> | <b>0.05</b>                        |
| species × sex                                        | 1,61          | 0.7           | 0.421            | 0.01                               |
| <b>modulation rate × carrier frequency</b>           | <b>12,764</b> | <b>6.3</b>    | <b>&lt;0.001</b> | <b>0.09</b>                        |
| <b>species × modulation rate × carrier frequency</b> | <b>12,764</b> | <b>2.6</b>    | <b>0.003</b>     | <b>0.04</b>                        |
| <b>sex × modulation rate × carrier frequency</b>     | <b>12,764</b> | <b>2.7</b>    | <b>0.001</b>     | <b>0.04</b>                        |
| species × sex × modulation rate                      | 6,768         | 1.3           | 0.243            | 0.01                               |
| species × sex × carrier frequency                    | 2,765         | 2.1           | 0.127            | 0.01                               |

915

916 Table 2 Results of Tukey posthoc contrasts. Bold indicates significant terms. Abbreviations:  
 917 Hch, *H. chrysoscelis*; Hcin, *H. cinerea*; F, female; M, male.

| contrast | carrier frequency | modulation rate | $\Delta$             | estimate    | SE         | df           | <i>t</i>    | <i>p</i> value   | effect size (Cohen's <i>d</i> ) |      |
|----------|-------------------|-----------------|----------------------|-------------|------------|--------------|-------------|------------------|---------------------------------|------|
| species  | low               | <b>12.5 Hz</b>  | <b>Hch &gt; Hcin</b> | <b>5.3</b>  | <b>2.4</b> | <b>764.2</b> | <b>2.2</b>  | <b>0.026</b>     | <b>0.16</b>                     |      |
|          |                   | 25 Hz           |                      | 3.1         | 1.7        | 561.7        | 1.8         | 0.070            | 0.15                            |      |
|          |                   | 50 Hz           |                      | -0.2        | 1.6        | 473.4        | -0.1        | 0.892            | 0.01                            |      |
|          |                   | 100 Hz          |                      | 1.3         | 1.4        | 353.1        | 1.0         | 0.337            | 0.10                            |      |
|          |                   | <b>200 Hz</b>   | <b>Hcin &gt; Hch</b> | <b>-5.5</b> | <b>1.5</b> | <b>406.5</b> | <b>-3.7</b> | <b>&lt;0.001</b> | <b>0.37</b>                     |      |
|          |                   | 400 Hz          |                      | -2.7        | 1.4        | 373.0        | -1.9        | 0.061            | 0.19                            |      |
|          |                   | 800 Hz          |                      | 1.0         | 1.6        | 504.0        | 0.6         | 0.533            | 0.06                            |      |
|          | middle            | 12.5 Hz         |                      |             | 3.4        | 2.4          | 765.8       | 1.4              | 0.153                           | 0.10 |
|          |                   | <b>25 Hz</b>    | <b>Hch &gt; Hcin</b> | <b>3.7</b>  | <b>1.7</b> | <b>523.8</b> | <b>2.2</b>  | <b>0.027</b>     | <b>0.19</b>                     |      |
|          |                   | 50 Hz           |                      |             | 1.4        | 1.7          | 529.1       | 0.9              | 0.386                           | 0.08 |
|          |                   | 100 Hz          |                      |             | -0.4       | 1.5          | 412.0       | -0.3             | 0.798                           | 0.03 |
|          |                   | <b>200 Hz</b>   | <b>Hcin &gt; Hch</b> | <b>-5.6</b> | <b>1.5</b> | <b>412.0</b> | <b>-3.8</b> | <b>0.000</b>     | <b>0.37</b>                     |      |
|          |                   | 400 Hz          |                      |             | -2.3       | 1.4          | 359.1       | -1.6             | 0.103                           | 0.17 |
|          |                   | <b>800 Hz</b>   | <b>Hcin &gt; Hch</b> | <b>-9.3</b> | <b>1.8</b> | <b>609.9</b> | <b>-5.1</b> | <b>&lt;0.001</b> | <b>0.41</b>                     |      |
|          | high              | 12.5 Hz         |                      |             | 3.3        | 2.1          | 701.3       | 1.6              | 0.111                           | 0.12 |
|          |                   | <b>25 Hz</b>    | <b>Hch &gt; Hcin</b> | <b>5.2</b>  | <b>1.6</b> | <b>493.3</b> | <b>3.2</b>  | <b>0.001</b>     | <b>0.29</b>                     |      |
|          |                   | <b>50 Hz</b>    | <b>Hch &gt; Hcin</b> | <b>5.9</b>  | <b>1.6</b> | <b>467.1</b> | <b>3.8</b>  | <b>&lt;0.001</b> | <b>0.35</b>                     |      |
|          |                   | <b>100 Hz</b>   | <b>Hch &gt; Hcin</b> | <b>6.2</b>  | <b>1.4</b> | <b>340.1</b> | <b>4.5</b>  | <b>&lt;0.001</b> | <b>0.48</b>                     |      |
|          |                   | <b>200 Hz</b>   | <b>Hcin &gt; Hch</b> | <b>-3.4</b> | <b>1.4</b> | <b>352.3</b> | <b>-2.4</b> | <b>0.016</b>     | <b>0.26</b>                     |      |
|          |                   | 400 Hz          |                      |             | 0.7        | 1.4          | 340.1       | 0.5              | 0.598                           | 0.06 |
|          |                   | 800 Hz          |                      |             | -1.7       | 2.8          | 796.8       | -0.6             | 0.550                           | 0.04 |
| sex      | low               | 12.5 Hz         |                      | 0.0         | 2.4        | 764.2        | 0.0         | 0.989            | 0.00                            |      |
|          |                   | 25 Hz           |                      | -0.2        | 1.7        | 561.7        | -0.1        | 0.916            | 0.01                            |      |
|          |                   | 50 Hz           |                      | -0.3        | 1.6        | 473.4        | -0.2        | 0.837            | 0.02                            |      |
|          |                   | 100 Hz          |                      | 0.2         | 1.4        | 353.1        | 0.2         | 0.869            | 0.02                            |      |
|          |                   | 200 Hz          |                      | 0.7         | 1.5        | 406.5        | 0.5         | 0.647            | 0.05                            |      |
|          |                   | <b>400 Hz</b>   | <b>F &gt; M</b>      | <b>5.3</b>  | <b>1.4</b> | <b>373.0</b> | <b>3.7</b>  | <b>&lt;0.001</b> | <b>0.39</b>                     |      |
|          |                   | 800 Hz          |                      | 2.3         | 1.6        | 504.0        | 1.4         | 0.159            | 0.13                            |      |
|          | middle            | 12.5 Hz         |                      |             | 2.6        | 2.4          | 765.8       | 1.1              | 0.272                           | 0.08 |
|          |                   | 25 Hz           |                      |             | 2.2        | 1.7          | 523.8       | 1.3              | 0.186                           | 0.12 |
|          |                   | <b>50 Hz</b>    | <b>F &gt; M</b>      | <b>4.3</b>  | <b>1.7</b> | <b>529.1</b> | <b>2.6</b>  | <b>0.011</b>     | <b>0.22</b>                     |      |
|          |                   | <b>100 Hz</b>   | <b>F &gt; M</b>      | <b>8.6</b>  | <b>1.5</b> | <b>412.0</b> | <b>5.8</b>  | <b>&lt;0.001</b> | <b>0.57</b>                     |      |
|          |                   | <b>200 Hz</b>   | <b>F &gt; M</b>      | <b>7.5</b>  | <b>1.5</b> | <b>412.0</b> | <b>5.0</b>  | <b>&lt;0.001</b> | <b>0.50</b>                     |      |
|          |                   | <b>400 Hz</b>   | <b>F &gt; M</b>      | <b>6.4</b>  | <b>1.4</b> | <b>359.1</b> | <b>4.5</b>  | <b>&lt;0.001</b> | <b>0.48</b>                     |      |
|          |                   | 800 Hz          |                      | 2.5         | 1.8        | 609.9        | 1.4         | 0.169            | 0.11                            |      |
|          | high              | 12.5 Hz         |                      |             | 0.1        | 2.1          | 701.3       | 0.0              | 0.965                           | 0.00 |
|          |                   | 25 Hz           |                      |             | 0.4        | 1.6          | 493.3       | 0.2              | 0.825                           | 0.02 |
|          |                   | 50 Hz           |                      |             | -0.2       | 1.6          | 467.1       | -0.1             | 0.898                           | 0.01 |
|          |                   | 100 Hz          |                      |             | -1.4       | 1.4          | 340.1       | -1.0             | 0.326                           | 0.11 |
|          |                   | 200 Hz          |                      |             | 0.2        | 1.4          | 352.3       | 0.1              | 0.883                           | 0.02 |
|          |                   | 400 Hz          |                      |             | -1.8       | 1.4          | 340.1       | -1.3             | 0.194                           | 0.14 |
|          |                   | 800 Hz          |                      |             | 2.9        | 2.8          | 796.8       | 1.1              | 0.294                           | 0.07 |

919 Table 3 Results of the ANOVA used to assess effects of species and subject sex on responses  
920 to paired clicks. Bold indicates significant terms.

| term                              | df           | <i>F</i>      | <i>p</i> value    | effect size<br>(partial $\eta^2$ ) |
|-----------------------------------|--------------|---------------|-------------------|------------------------------------|
| <b>intercept</b>                  | <b>1,60</b>  | <b>1109.8</b> | <b>&lt; 0.001</b> | <b>0.95</b>                        |
| <b>ICI</b>                        | <b>9,540</b> | <b>46.1</b>   | <b>&lt; 0.001</b> | <b>0.43</b>                        |
| species                           | 1,60         | 0.0           | 0.985             | 0.00                               |
| sex                               | 1,60         | 0.8           | 0.377             | 0.01                               |
| species $\times$ ICI              | 9,540        | 1.3           | 0.267             | 0.02                               |
| species $\times$ sex              | 1,60         | 1.3           | 0.264             | 0.02                               |
| sex $\times$ ICI                  | 9,540        | 0.8           | 0.490             | 0.01                               |
| species $\times$ sex $\times$ ICI | 9,540        | 1.7           | 0.170             | 0.03                               |

921

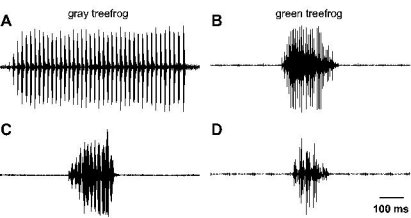

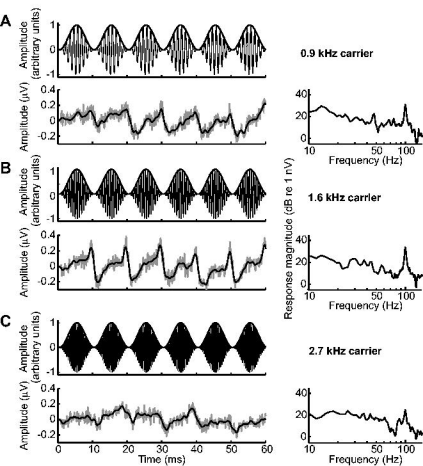



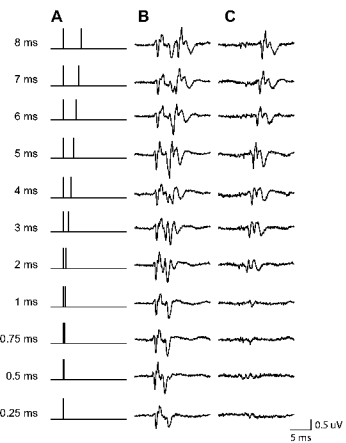

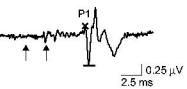

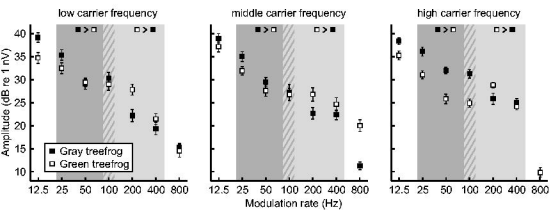

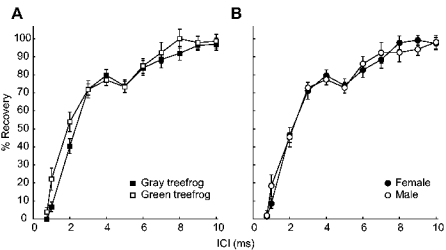

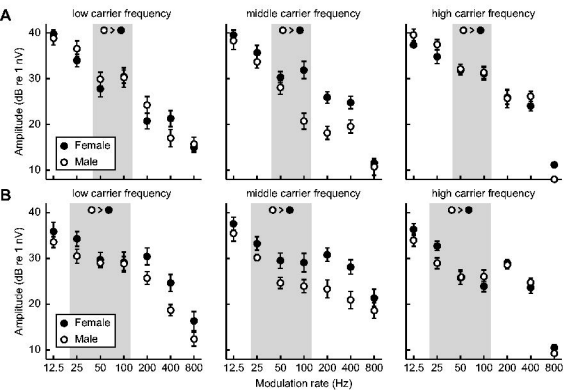

Source: https://cob.silverchair.com/jeb/article-pdf/doi/10.1242/jeb.115014/2033254/jeb_115014.pdf
